# Supplementary material for: 2,3,7,8-Tetrachlorodibenzo-P-Dioxin Induced Cell-Specific Drug Transporters With Acquired Cisplatin Resistance in Cisplatin Sensitive Cancer Cells
Source: PubMed Central journal article supplement — J Korean Med Sci. 2014 Sep 2;29(9):1188–98. doi: 10.3346/jkms.2014.29.9.1188 (PMC4168170; doi:10.3346/jkms.2014.29.9.1188), 2014-09-02
Supplement: jkms-29-1188-s003.pdf [file jkms-29-1188-s003.pdf]

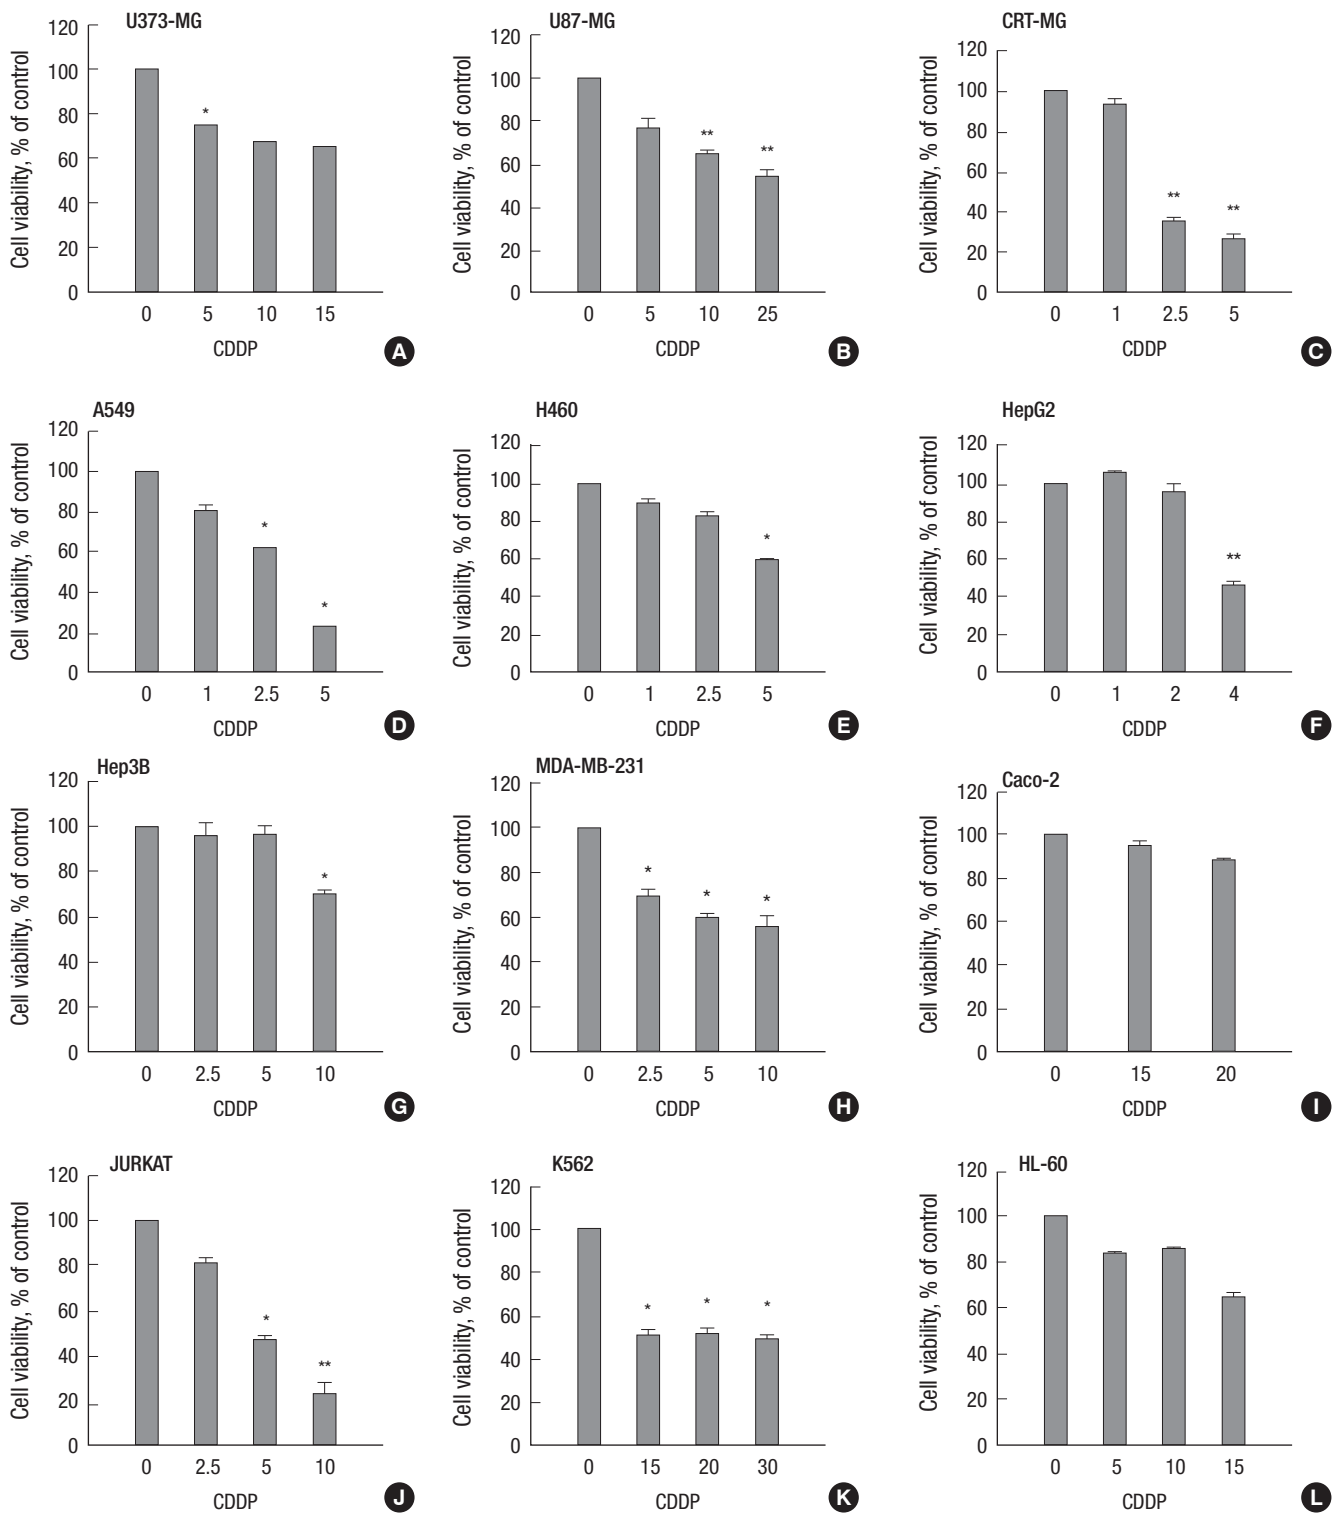

**Supplementary Fig. 3.** Sensitivity of cancer cells to cisplatin. Sensitivity to cisplatin was determined by measuring cell viability. Cancer cells were treated with various concentrations of cisplatin for one day. Results expressed as the mean  $\pm$  SD, show sensitivity of cancer cells to cisplatin.
