# Supplementary material for: 2,3,7,8-Tetrachlorodibenzo-P-Dioxin Induced Cell-Specific Drug Transporters With Acquired Cisplatin Resistance in Cisplatin Sensitive Cancer Cells
Source: PubMed Central journal article supplement — J Korean Med Sci. 2014 Sep 2;29(9):1188–98. doi: 10.3346/jkms.2014.29.9.1188 (PMC4168170; doi:10.3346/jkms.2014.29.9.1188), 2014-09-02
Supplement: jkms-29-1188-s004.pdf [file jkms-29-1188-s004.pdf]

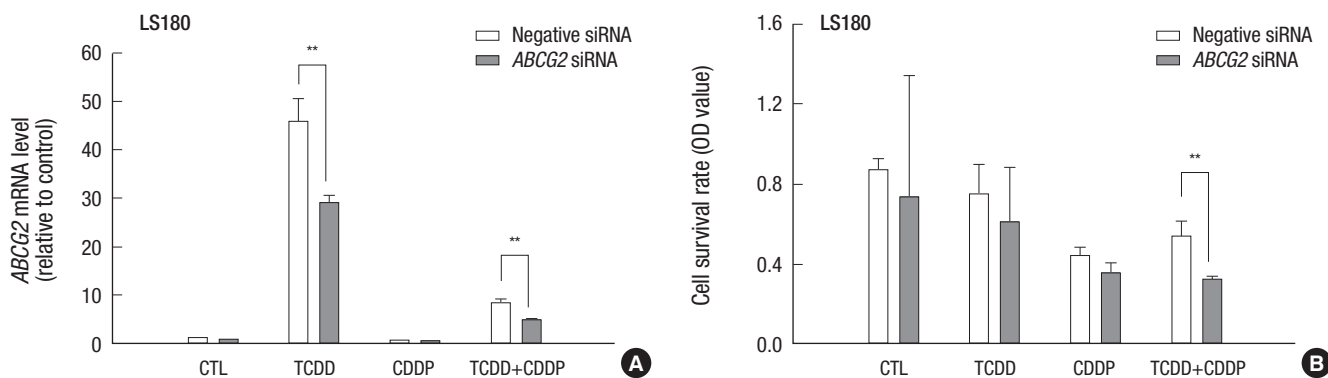

**Supplementary Fig. 4.** Increase of cell survival was reduced by inhibition of *ABCG2* expression in cancer cells with acquired cisplatin resistance induced by TCDD pretreatment. **(A)** Real time RT-PCR analysis indicates a reduction in *ABCG2* expression in LS180 cells 48 hr after transfection with the *ABCG2* siRNA (30 nM), compared to the negative control siRNA (30 nM). Human GAPDH was used as an internal control. **(B)** Cell survival of LS180 cells transfected with the *ABCG2* siRNA was assessed by the MTT assay. Survival rate of untreated, non-transfected cells was considered as 1.0. After transfection for 12 hr, LS180 cells were pretreated with 10 nM TCDD for one day and then treated with 10 µg/mL cisplatin for 12 hr. Data are presented as the mean ± SD from three independent experiments performed in duplicate. \*\* $P < 0.01$ ; CTL, control; TCDD, 2,3,7,8-tetrachlorodibenzo-p-dioxin; CDDP, cisplatin.
