# Supplementary material for: 2,3,7,8-Tetrachlorodibenzo-P-Dioxin Induced Cell-Specific Drug Transporters With Acquired Cisplatin Resistance in Cisplatin Sensitive Cancer Cells
Source: PubMed Central journal article supplement — J Korean Med Sci. 2014 Sep 2;29(9):1188–98. doi: 10.3346/jkms.2014.29.9.1188 (PMC4168170; doi:10.3346/jkms.2014.29.9.1188), 2014-09-02
Supplement: jkms-29-1188-s005.pdf [file jkms-29-1188-s005.pdf]

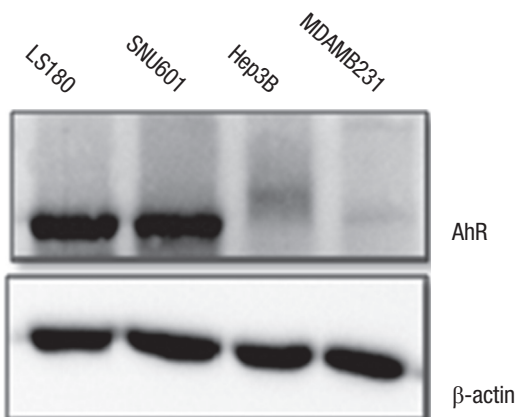

**Supplementary Fig. 5.** Basal AhR protein expression in cancer cells with acquired cisplatin resistance and unchanged sensitivity to cisplatin. Cells were lysated, protein concentration was determined using by Bradford assay, and 40  $\mu$ g of protein was used for western blot analysis as described in Supplementary information. Representative blots from three independent experiments are shown;  $\beta$ -actin was used as loading control.
