# Supplementary figures and images for: 2,3,7,8-Tetrachlorodibenzo-P-Dioxin Induced Cell-Specific Drug Transporters With Acquired Cisplatin Resistance in Cisplatin Sensitive Cancer Cells
Source: PubMed Central journal article supplement — J Korean Med Sci. 2014 Sep 2;29(9):1188–98. doi: 10.3346/jkms.2014.29.9.1188 (PMC4168170; doi:10.3346/jkms.2014.29.9.1188), 2014-09-02

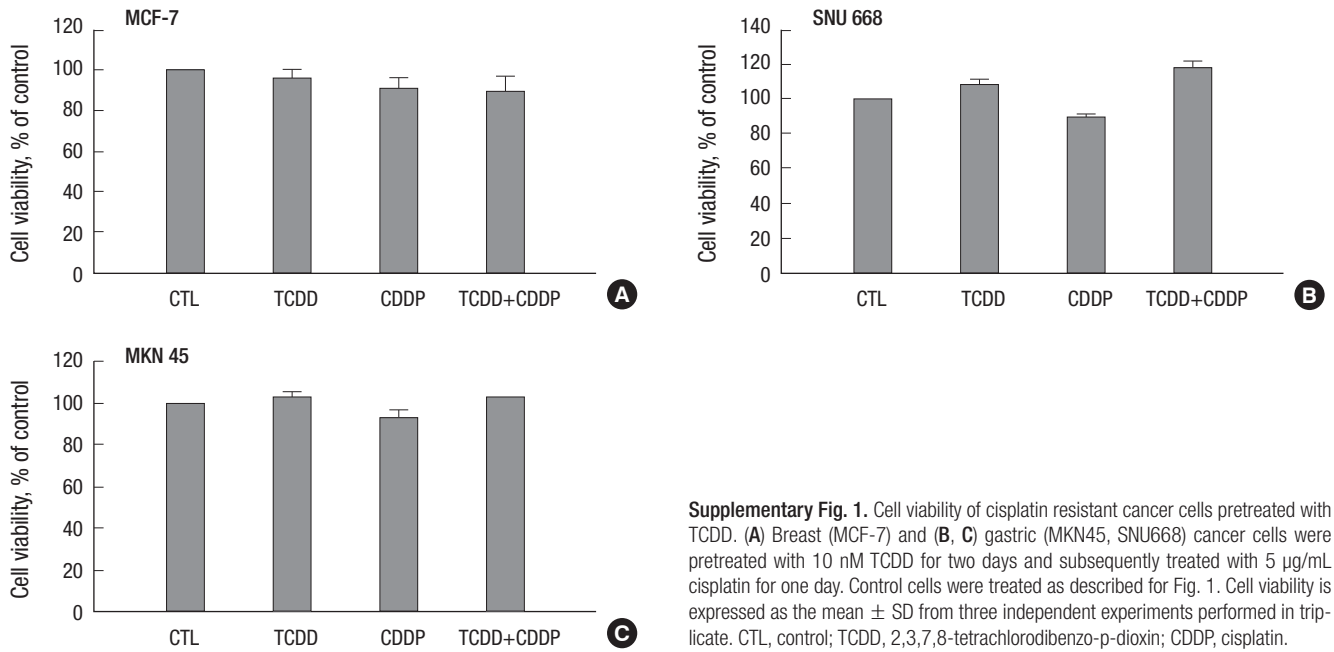

Supplement: jkms-29-1188-s001.pdf [file jkms-29-1188-s001.pdf]
